# Supplementary material
Source: PubMed Central journal article supplement (PMC2798725)
Supplement: ddp519_1.pdf [file ddp519_1.pdf]

## Supplemental Materials

### *Genotype Data*

In order to be included in a meta-analysis, studies needed to present data either in the form of allelic or genotypic contrasts. When data were reported as genotypes, the allelic table was calculated from the genotypes. Studies reporting data solely as odds ratios were entered in the database but not included in meta-analyses.

### *Duplicate Publications*

Two issues regarding duplicate populations were taken into account in our analysis and database design. First, some case or control groups likely were represented in multiple publications. If two or more publications shared an author and had a similar number of cases and/or controls with similar baseline characteristics, then these studies were considered to have been performed on the same population. For analyses of study population characteristics we excluded duplicate reports of the same study population, and in instances where a study population appeared to be a subset of a larger population from another publication, we counted only the larger study population.

Second, if association data for the same variant were reported from the same study population or a subset of the same population in multiple publications, then data from the largest study was entered and all other data was reported as “NA” and the study was designated as “overlaps with X” where X is the name of the largest study.

### *Genetic Variant Naming Issues*

We extracted variant names as they were used in the original publication, and we attempted to map each variant to an rs number. For variants in which the rs number was not reported, variant names were typically reported as amino acid substitutions, DNA substitutions, microsatellites, or insertion/deletions. We used the following algorithm to attempt to identify an rs number: 1.) We searched dbSNP using data presented on gene, genetic location (i.e. intron 4, etc.), nucleotide substitution or amino acid substitution. 2.) If rs assignment was still ambiguous, we used the reported primer data and the “in-silico PCR” function of the UCSC genome browser to generate sequence data which we then queried against the dbSNP database using BLAST. If primer data was not included in the original publication, or if the rs assignment remained ambiguous, we used the variant name as reported in the initial publication. In our database, each variant is linked to its corresponding rs number, DNA substitution, amino-acid change, and any other name used to refer to this variant in any publication. For cases in which there were naming discrepancies (i.e. slight changes in DNA position based on multiple transcription start sites), a single name was chosen to organize each variant, but the other names were maintained as aliases.

### *Comparison with Previous Meta-Analyses*

We compared our results with the results obtained by previous COPD meta-analytic efforts. In cases in which studies used different genetic models or fixed-effect meta-analyses methods, we repeated our analysis using the methods of each study to confirm that we could reproduce their results. In instances in which a large number of analyses were reported in a single paper, we reproduced the first analysis reported in a

table or figure. We did not reproduce analyses in which multiple alleles were grouped by putative function (i.e. EPHX1 fast vs slow variant).

Supplementary Table 1. Genes Included in Database

| Gene   | Chromosome | Comparisons** |
|--------|------------|---------------|
| ACE    | 17         | 6             |
| ADAM33 | 20         | 8             |
| ADRB2  | 5          | 11            |
| BDKRB2 | 14         | 1             |
| CAT    | 11         | 2             |
| CD63   | 12         | 3             |
| CDKN1A | 6          | 1             |
| CFTR   | 7          | 3             |
| CLCA1  | 1          | 8             |
| CYP1A1 | 15         | 2             |
| CYP2D6 | 22         | 1             |
| CYP2E1 | 10         | 5             |
| DCN    | 12         | 5             |
| DEFB1  | 8          | 3             |
| ELN    | 7          | 1             |
| EPHX1  | 1          | 30            |
| GABPA  | 21         | 4             |
| GC     | 4          | 2             |
| GCLC   | 6          | 1             |
| GSTMI  | 1          | 8             |
| GSTP1  | 11         | 12            |
| GSTT1  | 22         | 5             |
| HLA-B  | 6          | NA*           |
| HMOX1  | 22         | NA*           |
| HOXA11 | 7          | NA*           |
| HSPA1A | 6          | 1             |
| HSPA1B | 6          | 1             |
| HSPA1L | 6          | 1             |
| IL10   | 1          | 4             |
| IL11   | 19         | NA*           |
| IL13   | 5          | 9             |
| IL17F  | 6          | 1             |
| IL1B   | 2          | 10            |
| IL1RN  | 2          | 2             |
| IL4    | 5          | 11            |
| IL6    | 7          | 3             |
| IL8    | 4          | 4             |
| LTA    | 6          | 2             |
| MBL2   | 10         | 1             |
| MICB   | 6          | 1             |
| MMP1   | 11         | 2             |

|                                                                                                    |    |     |
|----------------------------------------------------------------------------------------------------|----|-----|
| MMP14                                                                                              | 14 | 12  |
| MMP2                                                                                               | 16 | 1   |
| MMP9                                                                                               | 20 | 6   |
| MRPL44                                                                                             | 2  | NA* |
| MS4A2                                                                                              | 11 | NA* |
| MSR1                                                                                               | 8  | 5   |
| NOS3                                                                                               | 7  | 5   |
| OGG1                                                                                               | 3  | 1   |
| PDE4D                                                                                              | 5  | 6   |
| SCGB1A1                                                                                            | 11 | 1   |
| SERPINA1                                                                                           | 14 | NA* |
| SERPINA3                                                                                           | 14 | 12  |
| SERPINE2                                                                                           | 2  | 8   |
| SFTPA1                                                                                             | 10 | NA* |
| SFTPB                                                                                              | 2  | 3   |
| SFTPD                                                                                              | 10 | 2   |
| SLC6A4                                                                                             | 17 | 3   |
| SOD1                                                                                               | 21 | 1   |
| SOD2                                                                                               | 6  | 2   |
| SOD3                                                                                               | 4  | 3   |
| TGFB1                                                                                              | 19 | 14  |
| TGFB2                                                                                              | 1  | 1   |
| TIMP2                                                                                              | 17 | 6   |
| TLR4                                                                                               | 9  | 1   |
| TLR6                                                                                               | 4  | 1   |
| TNF                                                                                                | 6  | 49  |
| TNFRSF1A                                                                                           | 12 | 1   |
| TNFRSF1B                                                                                           | 1  | 1   |
| TP53                                                                                               | 17 | 1   |
| VDR                                                                                                | 12 | 2   |
| VEGFA                                                                                              | 6  | 2   |
| * NA - data not available because polymorphisms not biallelic or studies excluded for other cause. |    |     |
| ** Distinct case-control comparisons.                                                              |    |     |

Supplementary Table 2: Meta-Analysis Results Obtained When Excluding Studies in which Data are Reported for Multiple Study Populations (i.e. more than 1 case-control comparison).

| Gene     | Polymorphism | rs number     | Contrast    | OR                | Studies* | Studies Removed? |
|----------|--------------|---------------|-------------|-------------------|----------|------------------|
| ACE      | indel        |               | del --> ins | 1.02 (0.80-1.30)  | 4        | Yes              |
| ADRB2    | +46 AG       | rs104271<br>3 | A to G      | 1.17 (0.69-1.97)  | 3        | Yes              |
| ADRB2    | +79 CG       | rs104271<br>4 | C to G      | 1.32 (0.91 -1.93) | 3        | Yes              |
| EPHX1    | His139Arg    | rs223492<br>2 | A to G      | 1.06 (0.90-1.25)  | 13       | Yes              |
| EPHX1    | Tyr113His    | rs105174<br>0 | C to T      | 1.12 (0.94-1.33)  | 13       | Yes              |
| GSTP1    | Ile105Val    | rs1695        | A to G      | 1.09 (0.80-1.48)  | 10       | No               |
| IL13     | +2044 GA     |               | A to G      | NA                | 2        | Yes              |
| IL13     | -1055 CT     |               | C to T      | NA                | 1        | Yes              |
| IL1B     | -31 TC       |               | C to T      | NA                | 2        | Yes              |
| IL1B     | -511 CT      |               | C to T      | 1.80 (1.35-2.39)  | 3        | Yes              |
| IL4      | -33 CT       | rs207087<br>4 | C to T      | NA                | 2        | Yes              |
| IL6      | -174 GC      |               | C to G      | NA                | 1        | Yes              |
| LTA      | +252 AG      |               | A to G      | NA                | 2        | Yes              |
| MMP9     | -1562 CT     |               | C to T      | 0.69 (0.44-1.09)  | 4        | No               |
| SERPINA3 | Ala9Thr      |               | A to G      | 0.80 (0.62-1.03)  | 5        | No               |
| SOD3     | Arg213Gly    | rs179989<br>5 | C to G      | NA                | 1        | Yes              |
| TGFB1    | -509 CT      | rs180046<br>9 | C to T      | 1.05 (0.70-1.58)  | 4        | No               |
| TGFB1    | +29 TC       | rs180047<br>0 | C to T      | 0.76 (0.64-0.88)  | 3        | Yes              |
| TIMP2    | +853 GA      | rs227769<br>8 | A to G      | 0.59 (0.23-1.48)  | 3        | No               |
| TNF      | +489 GA      | rs180061<br>0 | A to G      | NA                | 2        | Yes              |
| TNF      | -1031 TC     | rs179996<br>4 | C to T      | NA                | 1        | Yes              |
| TNF      | -238 GA      | rs361525      | A to G      | 0.79 (0.50-1.25)  | 3        | Yes              |
| TNF      | -308 GA      | rs180062<br>9 | A to G      | 1.05 (0.91-1.21)  | 11       | Yes              |
| TNF      | -857 CT      | rs179972<br>4 | C to T      | NA                | 1        | Yes              |
| TNF      | -863 CA      | rs180063<br>0 | A to C      | NA                | 2        | Yes              |
| GSTM1    | null         |               | null --> wt | 1.45 (1.09-1.92)  | 8        | No               |
| GSTT1    | null         |               | null --> wt | 0.92 (0.73-1.15)  | 5        | No               |

\* Number of case-control comparisons in which a variant has been tested for association with COPD.

Supplementary Table 3: Meta-Analysis Results Obtained without Dividing Cases and Controls by the Number of Duplicate Contrasts to Avoid Double-Counting

| Gene     | Polymorphism | rs number     | Contrast    | OR               | Studies* |
|----------|--------------|---------------|-------------|------------------|----------|
| ACE      | indel        |               | del --> ins | 1.16 (0.96-1.40) | 6        |
| ADRB2    | +46 AG       | rs104271<br>3 | A to G      | 1.11 (0.75-1.65) | 5        |
| ADRB2    | +79 CG       | rs104271<br>4 | C to G      | 0.89 (0.51-1.41) | 5        |
| EPHX1    | His139Arg    | rs223492<br>2 | A to G      | 1.06 (0.91-1.22) | 15       |
| EPHX1    | Tyr113His    | rs105174<br>0 | C to T      | 1.11 (0.95-1.29) | 15       |
| GSTP1    | Ile105Val    | rs1695        | A to G      | 1.09 (0.80-1.48) | 10       |
| IL13     | +2044 GA     |               | A to G      | 1.03 (0.80-1.33) | 4        |
| IL13     | -1055 CT     |               | C to T      | 0.73 (0.35-1.50) | 3        |
| IL1B     | -31 TC       |               | C to T      | 0.95 (0.65-1.40) | 4        |
| IL1B     | -511 CT      |               | C to T      | 1.42 (0.96-2.10) | 5        |
| IL4      | -33 CT       | rs207087<br>4 | C to T      | 1.07 (0.81-1.40) | 4        |
| IL6      | -174 GC      |               | C to G      | 0.97 (0.75-1.24) | 5        |
| LTA      | +252 AG      |               | A to G      | 1.00 (0.82-1.22) | 4        |
| MMP9     | -1562 CT     |               | C to T      | 0.69 (0.44-1.09) | 4        |
| SERPINA3 | Ala9Thr      |               | A to G      | 0.80 (0.62-1.03) | 5        |
| SOD3     | Arg213Gly    | rs179989<br>5 | C to G      | 2.22 (1.32-3.75) | 3        |
| TGFB1    | -509 CT      | rs180046<br>9 | C to T      | 1.05 (0.70-1.58) | 4        |
| TGFB1    | +29 TC       | rs180047<br>0 | C to T      | 0.72 (0.63-0.82) | 5        |
| TIMP2    | +853 GA      | rs180061<br>0 | A to G      | 0.59 (0.23-1.48) | 3        |
| TNF      | +489 GA      | rs180061<br>0 | A to G      | 1.22 (0.94-1.59) | 6        |
| TNF      | -1031 TC     | rs179996<br>4 | C to T      | 0.86 (0.67-1.10) | 3        |

|                                                                                                    |         |           |             |                  |    |
|----------------------------------------------------------------------------------------------------|---------|-----------|-------------|------------------|----|
| TNF                                                                                                | -238 GA | rs361525  | A to G      | 0.84 (0.58-1.22) | 5  |
| TNF                                                                                                | -308 GA | rs1800629 | A to G      | 1.21 (1.03-1.43) | 27 |
| TNF                                                                                                | -857 CT | rs1799724 | C to T      | 1.02 (0.79-1.31) | 3  |
| TNF                                                                                                | -863 CA | rs1800630 | A to C      | 0.87 (0.66-1.14) | 3  |
| GSTM1                                                                                              | null    |           | null --> wt | 1.45 (1.09-1.92) | 8  |
| GSTT1                                                                                              | null    |           | null --> wt | 0.92 (0.73-1.15) | 5  |
| * Number of case-control comparisons in which a variant has been tested for association with COPD. |         |           |             |                  |    |

Search Strategy Used for Ovid Database Search - Search conducted July 16, 2008.

1. copd.mp. or exp Pulmonary Disease, Chronic Obstructive/
2. emphysema.mp. or exp Emphysema/ or exp Pulmonary Emphysema/
3. chronic bronchitis.mp. or exp Bronchitis, Chronic/
4. chronic obstructive pulmonary disease.mp.
5. exp Forced Expiratory Volume/ or fev1.mp.
6. 1 or 2 or 3 or 4 or 5
7. gene.mp. or exp Genes/
8. exp Genetics, Population/ or exp "Variation (Genetics)"/ or exp "Enhancer Elements (Genetics)"/ or Genetic.mp. or exp "Antisense Elements (Genetics)"/ or exp "Trans-Activation (Genetics)"/ or exp Genetics/ or exp "Operator Regions (Genetics)"/ or exp

"Selection (Genetics)"/ or exp "Terminator Regions (Genetics)"/ or exp "Linkage (Genetics)"/ or exp Genetics, Behavioral/ or exp "Promoter Regions (Genetics)"/ or exp Genetics, Medical/

9. genotype.mp. or exp Genotype/

10. allele.mp. or exp Alleles/

11. polymorphism.mp. or exp Polymorphism, Restriction Fragment Length/ or exp Polymorphism, Single-Stranded Conformational/ or exp Polymorphism, Genetic/ or exp Polymorphism, Single Nucleotide/

12. haplotype.mp. or exp Haplotypes/

13. exp "Linkage (Genetics)"/ or linkage.mp. or exp Linkage Disequilibrium/

14. exp Chromosome Mapping/ or exp Genetic Predisposition to Disease/ or exp "Linkage (Genetics)"/ or genome wide scan.mp. or exp Genome, Human/ or exp Lod Score/

15. 7 or 8 or 9 or 10 or 11 or 12 or 13 or 14

16. 6 and 15

17. limit 16 to (humans and english language)

18. limit 17 to "review articles"

19. 17 not 18
